# Supplementary material
Source: PubMed Central journal article supplement (PMC3478046)
Supplement: supp_mcs175_mcs175supp.pdf [file supp_mcs175_mcs175supp.pdf]

# SUPPLEMENTARY DATA

FIG. S1. Variation of the maximum and minimum temperature, expressed as annual means and as the May–September period, at the four sampling sites (note graphs have different scales).

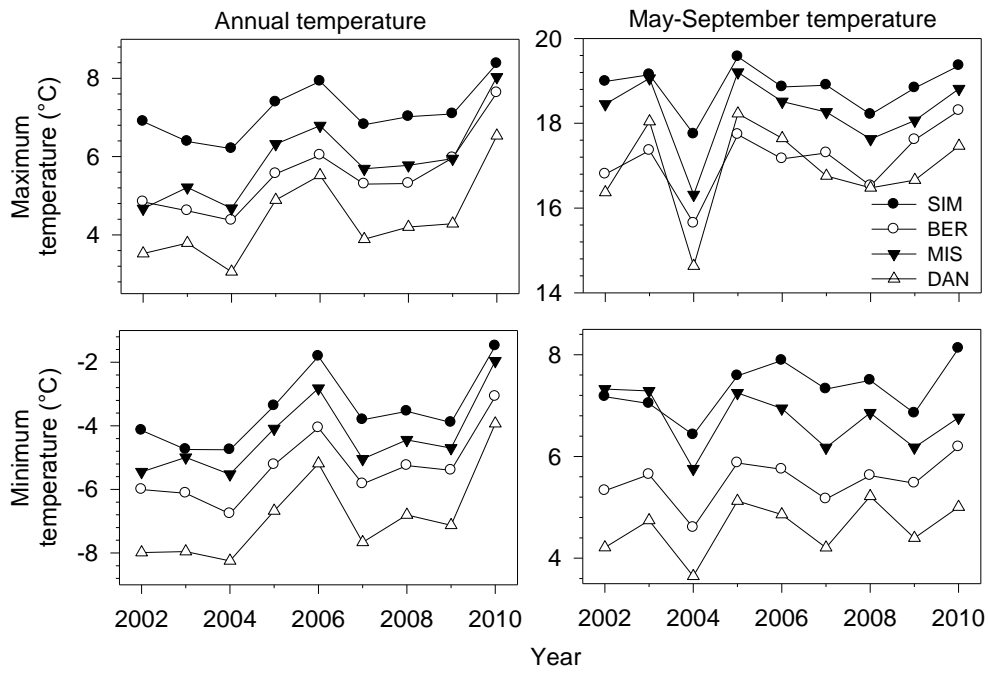

FIG. S2. Deviation from the average temperature of the period 1950–2010, in the form of difference between the actual and historical mean temperatures.

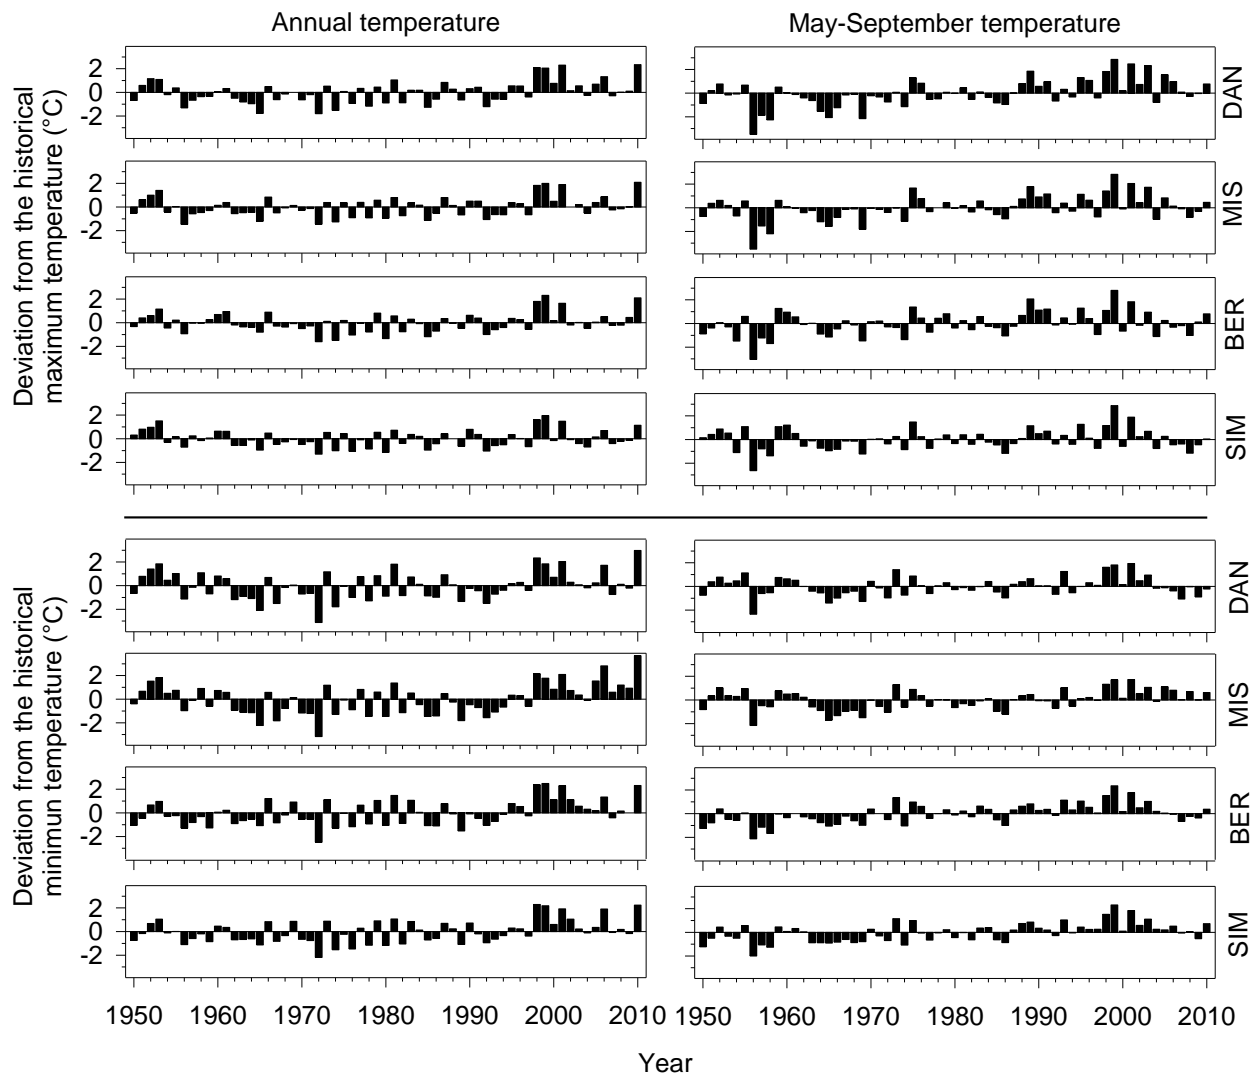

TABLE S1. Relationships (in the form of linear regressions) between measured and estimated temperatures at the four study sites for the overlapping years 2002–2004. All models were significant at  $P < 0.0001$ .

| Temperature | Site | Annual    |       |          | May–September |       |          |
|-------------|------|-----------|-------|----------|---------------|-------|----------|
|             |      | Intercept | Slope | R square | Intercept     | Slope | R square |
| Minimum     | DAN  | 0.80      | 0.95  | 0.87     | 2.22          | 0.82  | 0.62     |
|             | MIS  | -0.35     | 0.96  | 0.87     | 1.66          | 0.76  | 0.57     |
|             | BER  | 0.93      | 0.90  | 0.86     | 2.37          | 0.77  | 0.60     |
|             | SIM  | 0.82      | 0.90  | 0.86     | 2.95          | 0.73  | 0.56     |
| Maximum     | DAN  | 0.96      | 0.97  | 0.93     | 4.02          | 0.82  | 0.72     |
|             | MIS  | 0.87      | 0.99  | 0.94     | 3.76          | 0.85  | 0.71     |
|             | BER  | 0.81      | 0.97  | 0.93     | 3.82          | 0.81  | 0.69     |
|             | SIM  | 0.52      | 0.98  | 0.92     | 4.52          | 0.79  | 0.67     |
